# Supplementary material
Source: Springer Nature journal article supplement (https://www.springermedizin.de/resource/supplementary/13229_2013_96_MOESM1_ESM.pdf/9676152)

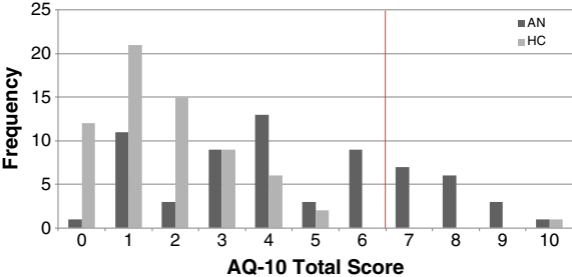

Supplement: MOESM1 [file 9676152]
